# Supplementary material for: Effects of heart rate variability biofeedback during exposure to fear-provoking stimuli within spider-fearful individuals: study protocol for a randomized controlled trial
Source: Springer Nature journal article supplement (doi:10.1186/s13063-018-2554-2), 2018-03-16
Supplement: MOESM1 [file 15542534]

**ADDITIONAL FILE 1: Effects of Heart Rate Variability Biofeedback during Exposure to Fear-Provoking**

Stimuli within Spider Fearful Individuals: Study Protocol for a Randomized-Controlled Trial

**AUTHORS:** Sarah K. Schäfer, Frank R. Ihmig, Karen A. Lara H., Frank Neurohr, Stephan Kiefer, Marlene Staginnus, Johanna Lass-Hennemann & Tanja Michael

**Questions on self-efficacy in handling a spider** (all rate one a scale from 0 “totally unconfident” to 10 “totally confident”):

1. How confident do you feel at the moment in/about dealing with a spider?
2. How confident do you feel at the moment about being in a room, in which you know is a spider?
3. How confident do you feel at the moment of/about catching a spider with a glass in your apartment?
