# Supplementary material for: Effects of heart rate variability biofeedback during exposure to fear-provoking stimuli within spider-fearful individuals: study protocol for a randomized controlled trial
Source: Springer Nature journal article supplement (doi:10.1186/s13063-018-2554-2), 2018-03-16
Supplement: MOESM2 [file 15542534]

spider video clips

biofeedback information

XTRA  
\*\*\*\*\*
