# Supplementary material for: Effects of heart rate variability biofeedback during exposure to fear-provoking stimuli within spider-fearful individuals: study protocol for a randomized controlled trial
Source: Springer Nature journal article supplement (doi:10.1186/s13063-018-2554-2), 2018-03-16

### ADDITIONAL FILE 3: Effects of Heart Rate Variability Biofeedback during Exposure to Fear-Provoking

Stimuli within Spider Fearful Individuals: Study Protocol for a Randomized-Controlled Trial

**AUTHORS:** Sarah K. Schäfer, Frank R. Ihmig, Karen A. Lara H., Frank Neurohr, Stephan Kiefer, Marlene

Staginnus, Johanna Lass-Hennemann & Tanja Michael

#### I. HRV Biofeedback

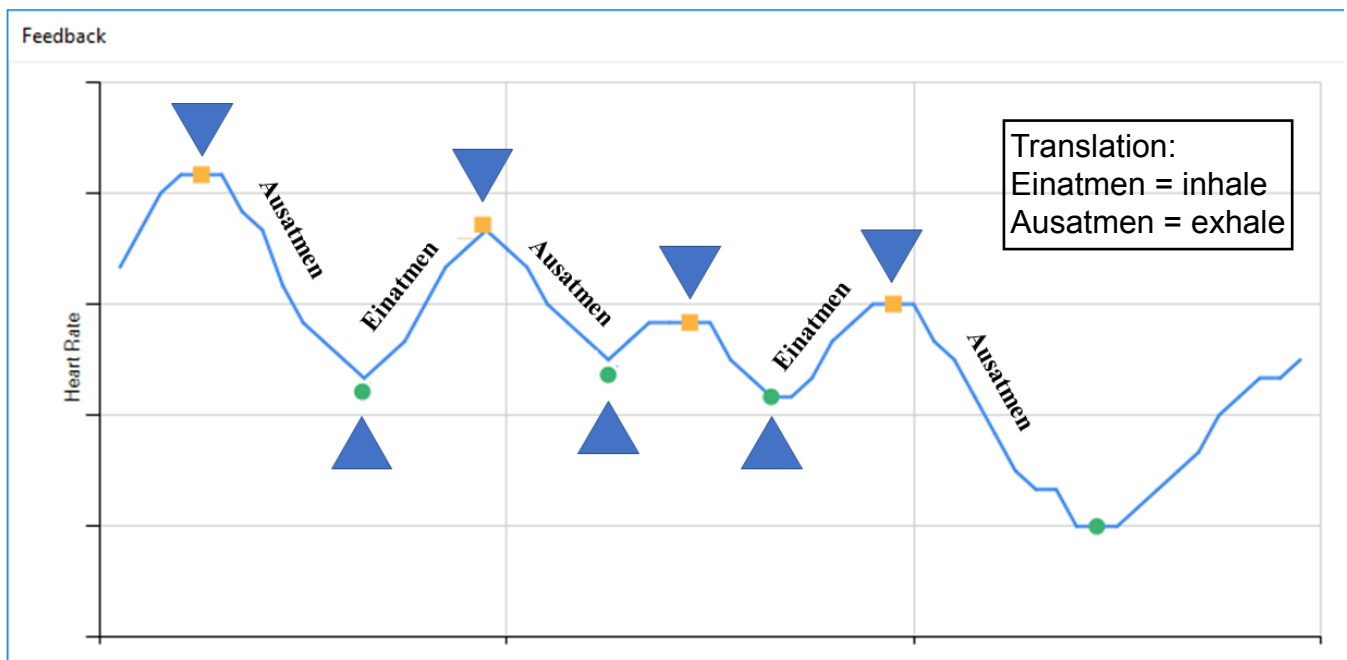

#### II. Tapping Task

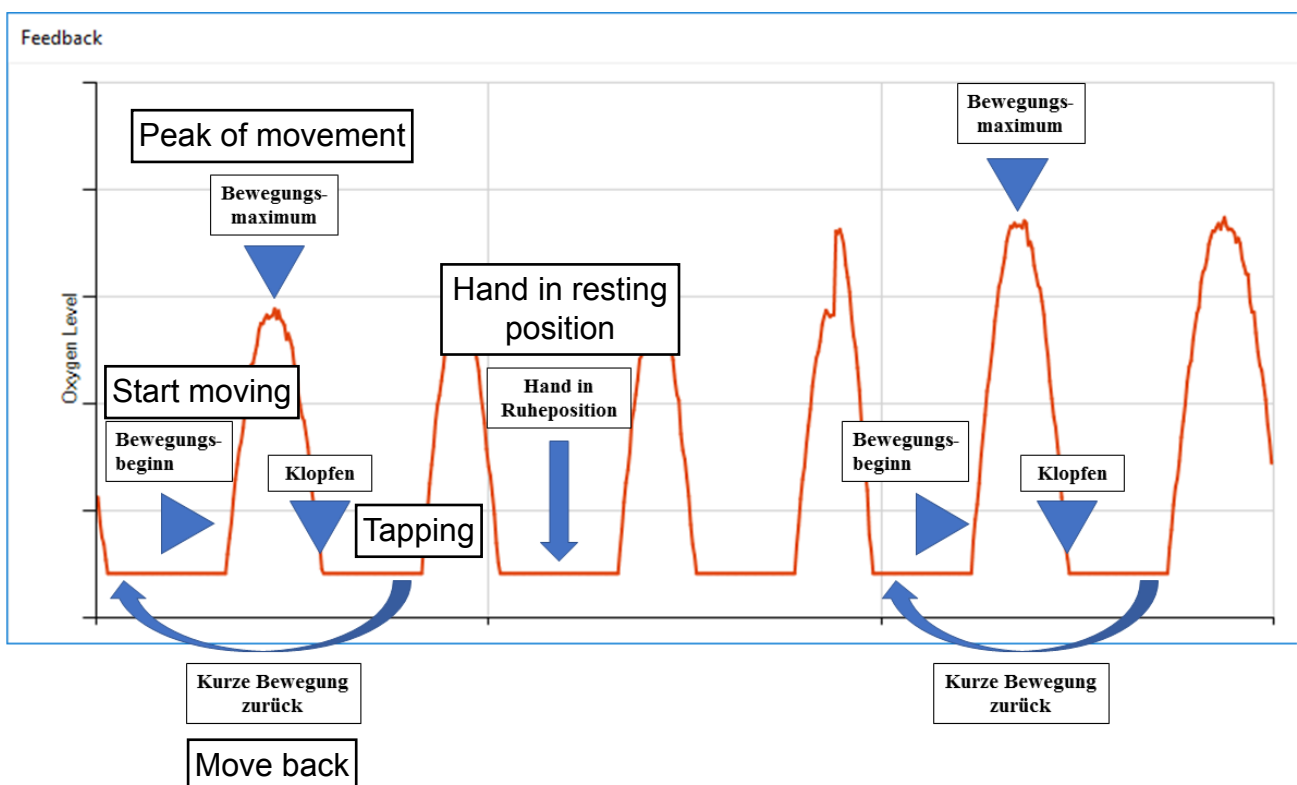

### III. Rhythmic hand movement

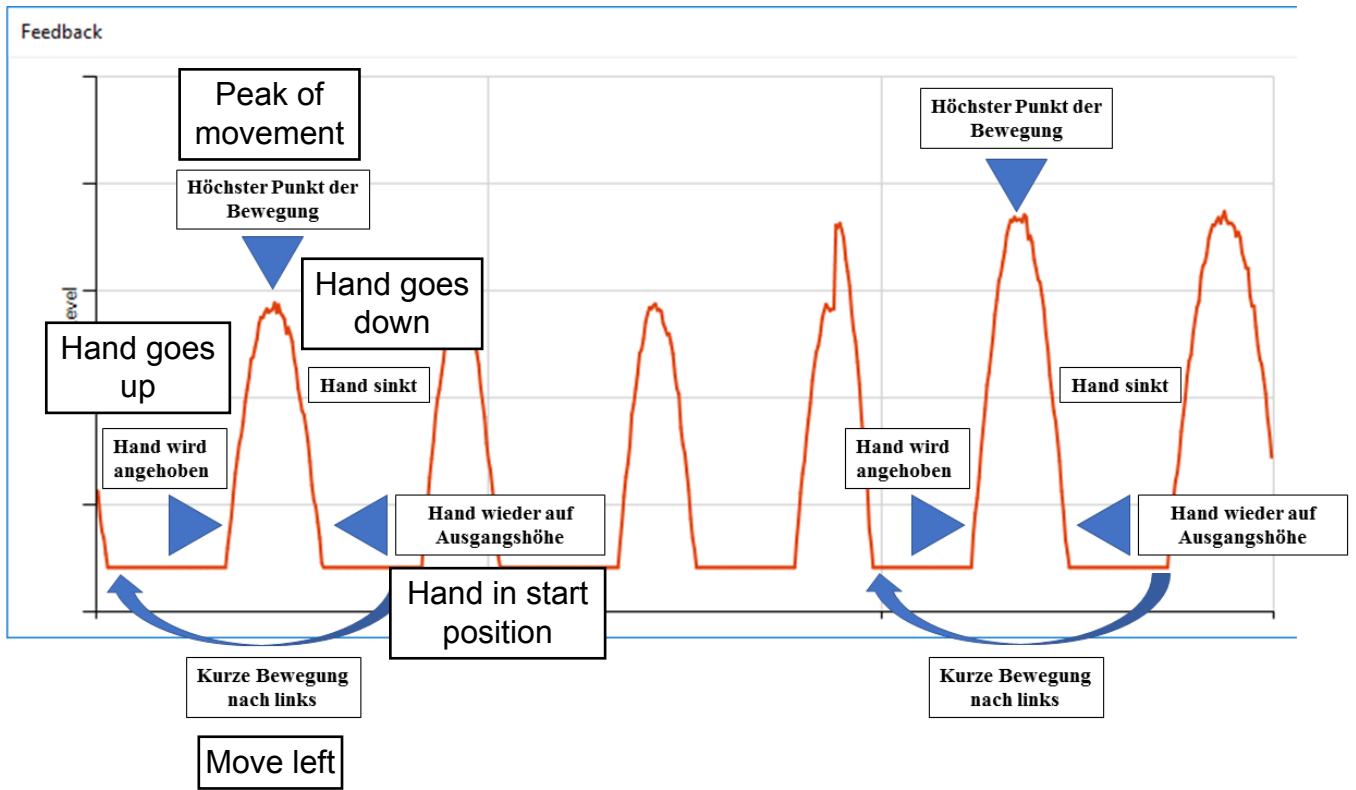

Supplement: MOESM3 [file 15542534]
